# Supplementary material for: Facile aqueous synthesis of hollow dual plasmonic hetero-nanostructures with tunable optical responses through nanoscale Kirkendall effects
Source: Royal Society of Chemistry journal article supplement (doi:10.1039/d2na00606e), 2022-11-10
Supplement: d2na00606e1.pdf [file d2na00606e1.pdf]

Supporting Information for

# Facile Aqueous Synthesis of Hollow Dual Plasmonic Hetero- Nanostructures with Tunable Optical Responses through the Nanoscale Kirkendall Effects

Mariia Ivanchenko,<sup>†</sup> Alison L. Carroll,<sup>†</sup> Andrea B. Brothers,<sup>§</sup> and Hao Jing<sup>†, \*</sup>

<sup>†</sup> Department of Chemistry and Biochemistry, George Mason University, Fairfax, Virginia 22030, USA

<sup>§</sup> Department of Chemistry, American University, Washington, DC 20016, USA

\* To whom correspondence should be addressed.

Email: [hjing2@gmu.edu](mailto:hjing2@gmu.edu)

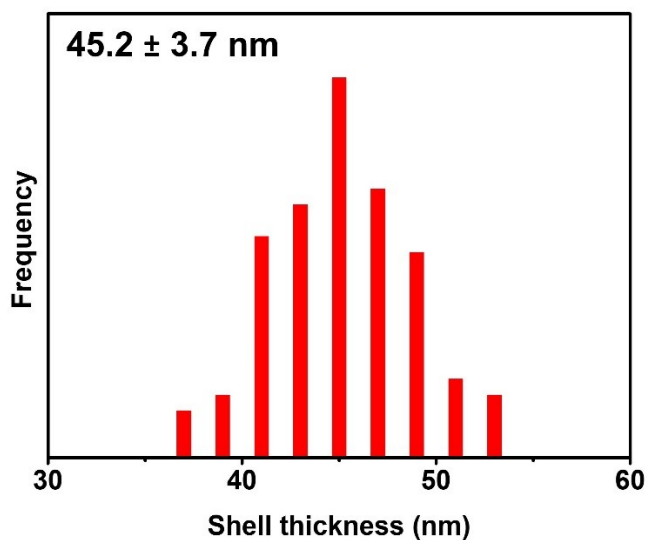

Fig. S1. Distribution of Cu<sub>2</sub>O shell thickness obtained from TEM images of Au@Cu<sub>2</sub>O NPs.

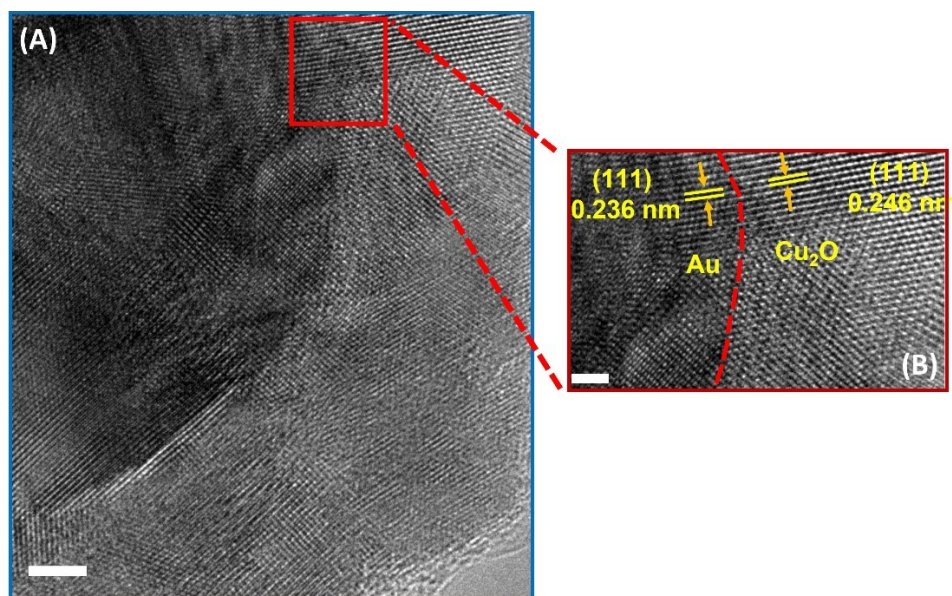

Fig. S2. (A) HRTEM image of an Au@Cu<sub>2</sub>O nanoparticle with denoted interface line that was examined. The scale bar is 10 nm. (B) HRTEM image of an Au@Cu<sub>2</sub>O nanoparticle with indicated interplanar spacings corresponding to the lattice fringes of the (111) planes of the Au core and Cu<sub>2</sub>O shell. The scale bar is 5 nm.

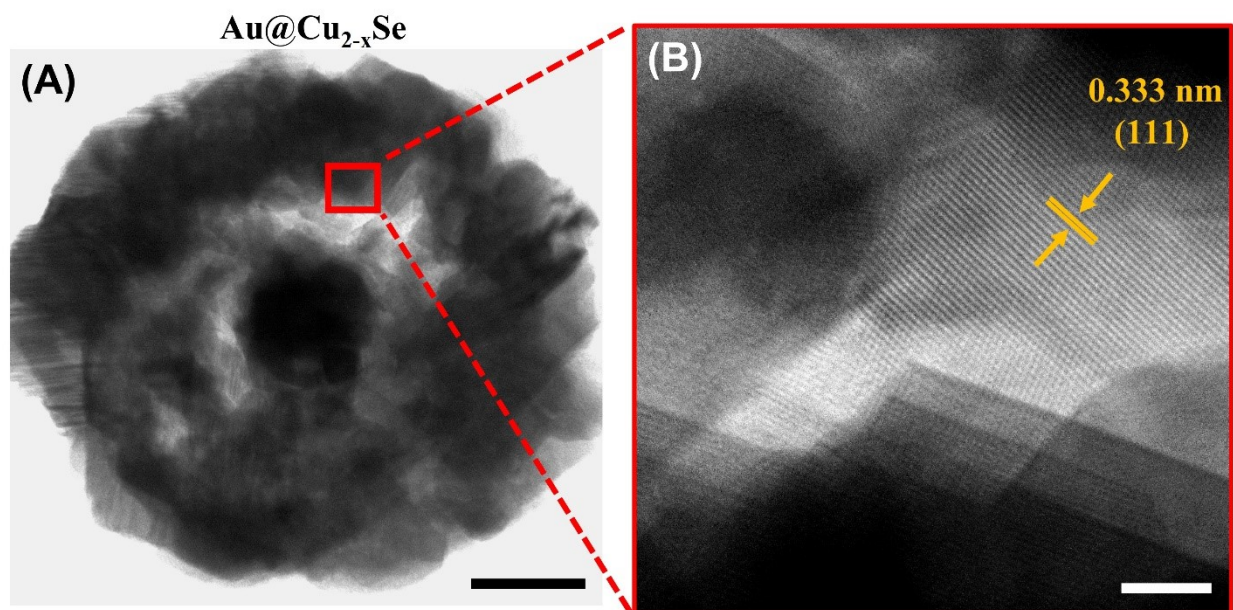

Fig. S3. (A) HRTEM image of an Au@Cu<sub>2-x</sub>Se nanoparticle with the denoted examined area. The scale bar is 50 nm. (B) HRTEM image of an Au@Cu<sub>2-x</sub>Se nanoparticle with indicated interplanar spacing corresponding to the lattice fringes of the (111) planes of the Cu<sub>2-x</sub>Se shell. The scale bar is 5 nm.

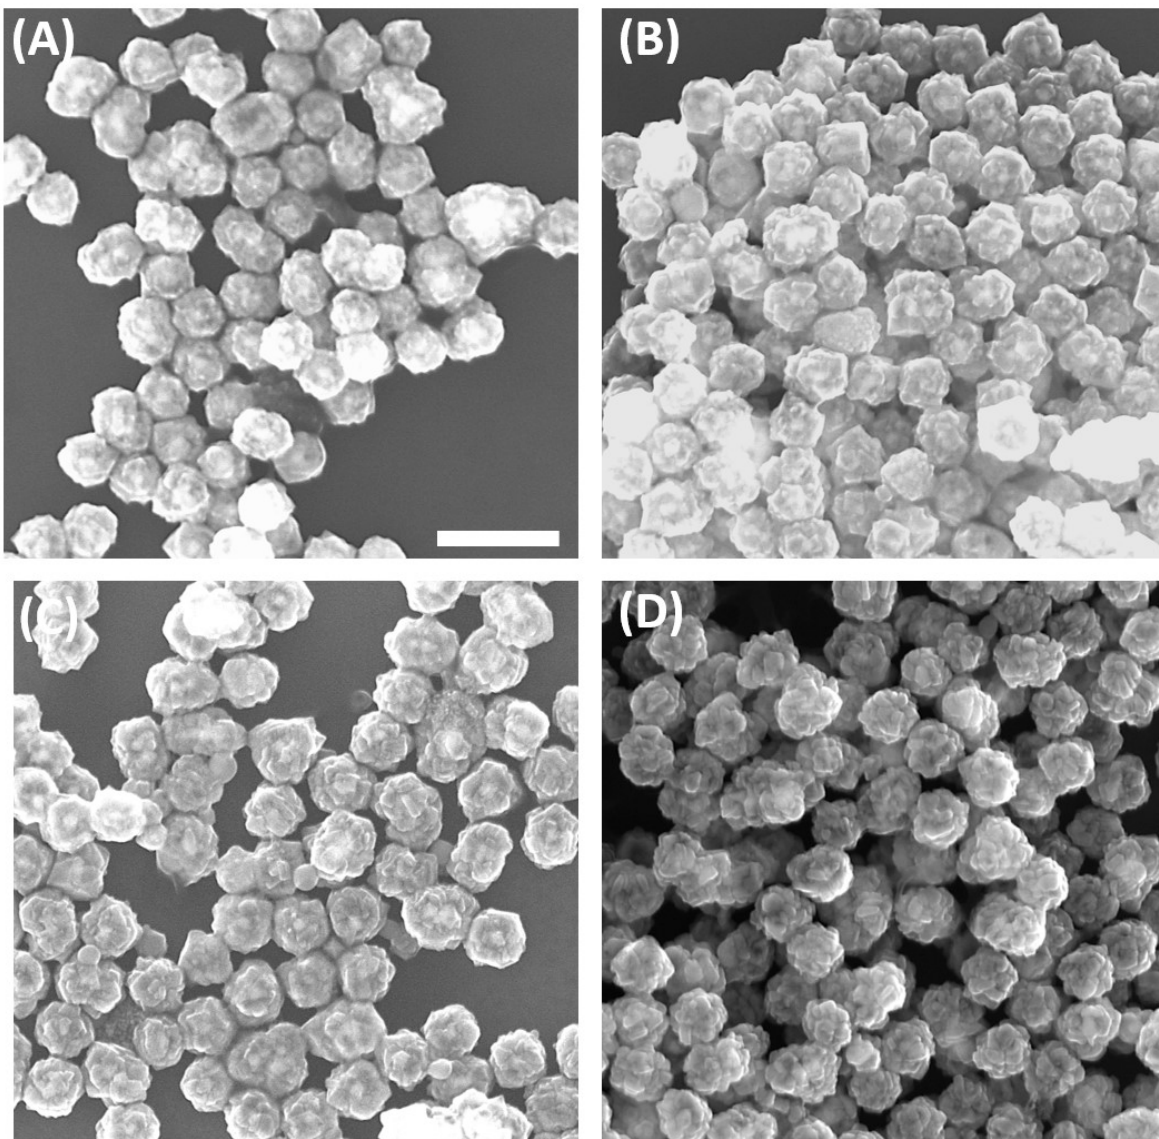

Fig. S4. SEM images of hollow Au@Cu<sub>2-x</sub>Se NPs obtained using (A) 10  $\mu$ L, (B) 50  $\mu$ L, (C) 100  $\mu$ L, (D) 200  $\mu$ L of 50 mM (CH<sub>3</sub>)<sub>2</sub>NC(Se)NH<sub>2</sub> aqueous solution. Scale bars correspond to 500 nm.



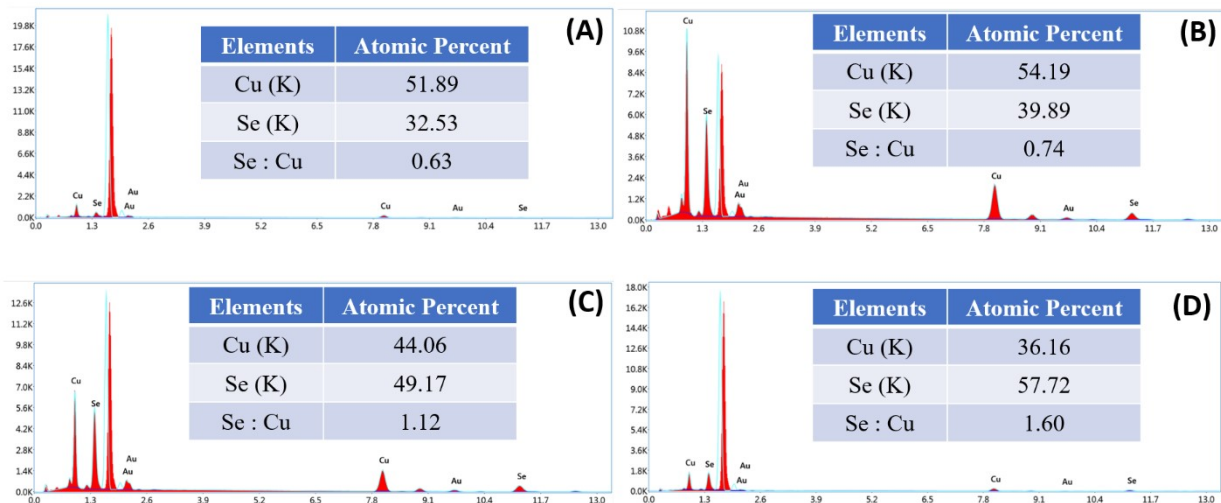

Fig. S5. The EDX spectra of hollow Au@Cu<sub>2-x</sub>Se NPs obtained using (A) 10  $\mu$ L, (B) 50  $\mu$ L, (C) 100  $\mu$ L, (D) 200  $\mu$ L of 50 mM (CH<sub>3</sub>)<sub>2</sub>NC(Se)NH<sub>2</sub> aqueous solution.

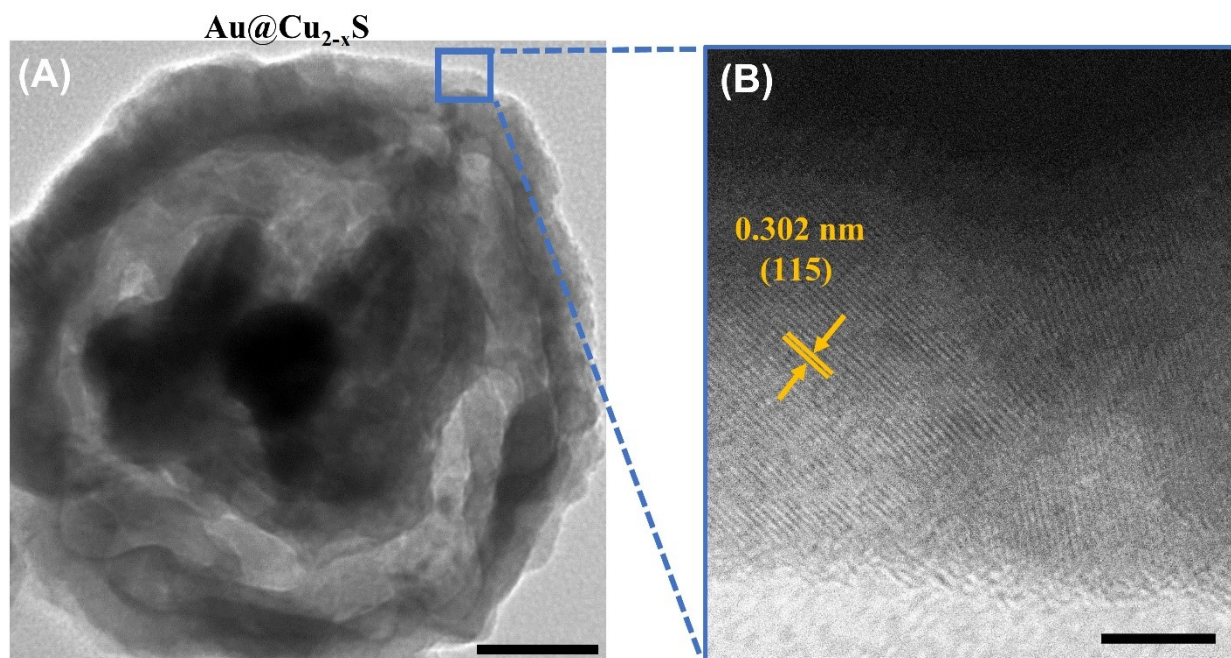

Fig. S6. (A) HRTEM image of an Au@Cu<sub>2-x</sub>S nanoparticle with the denoted examined area. The scale bar is 50 nm. (B) HRTEM image of an Au@Cu<sub>2-x</sub>S nanoparticle with indicated interplanar spacing corresponding to the lattice fringes of the (115) planes of the Cu<sub>2-x</sub>S shell. The scale bar is 5 nm.

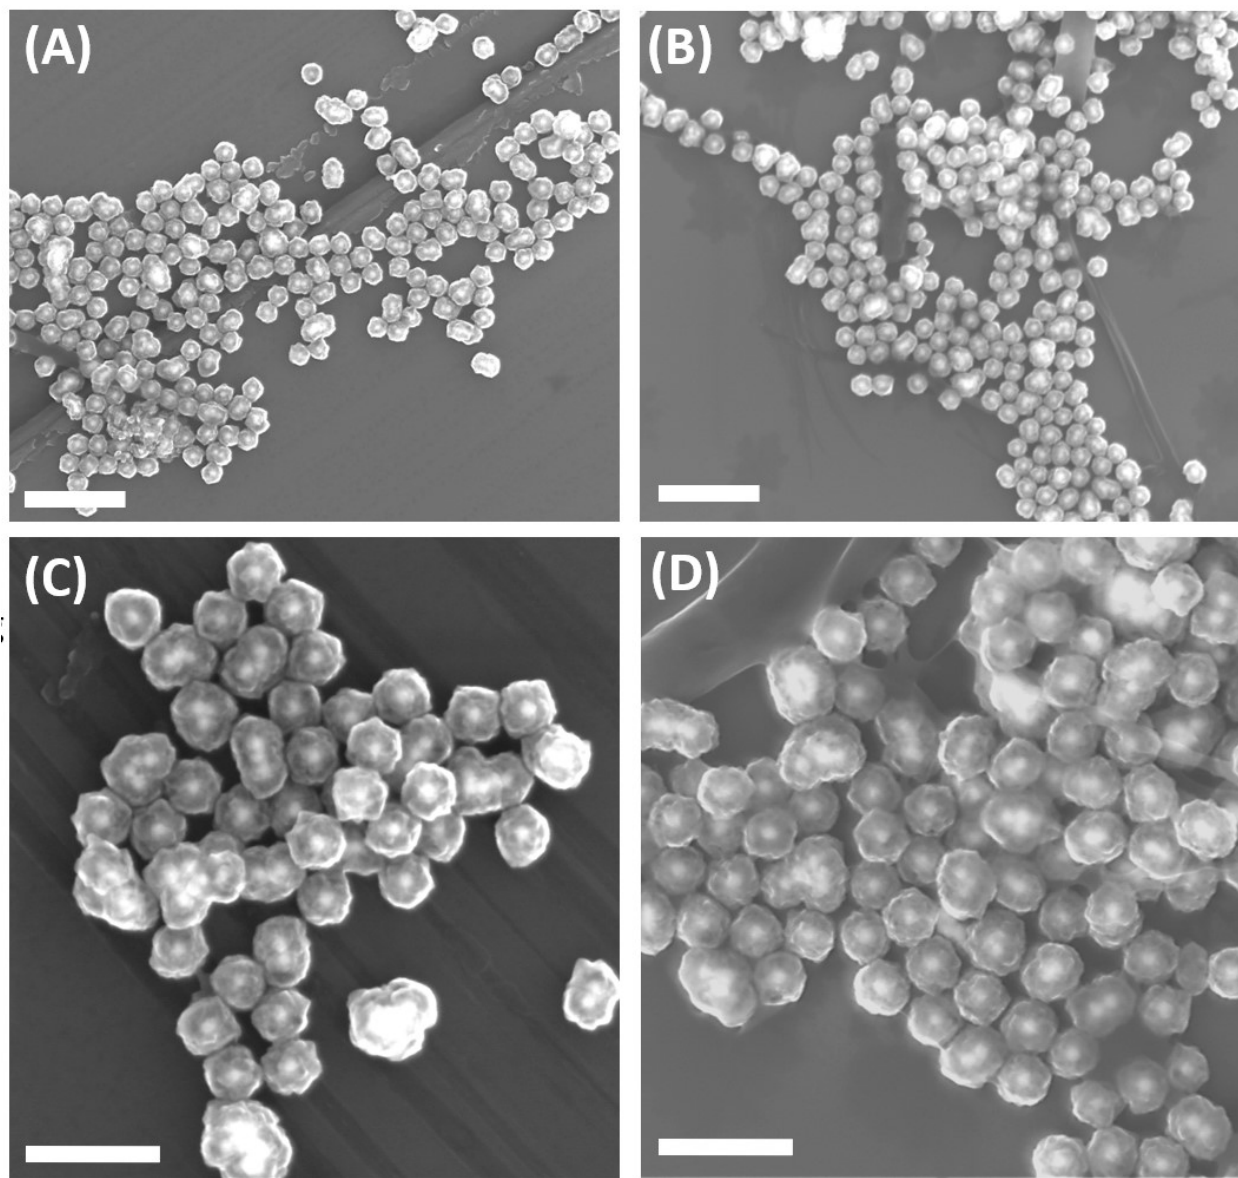

Fig. S7. SEM images of hollow Au@Cu<sub>2-x</sub>S NPs at high and low magnifications obtained using (A) 10  $\mu$ L, (B) 200  $\mu$ L of 50 mM CH<sub>3</sub>C(S)NH<sub>2</sub>, scale bars correspond to 1  $\mu$ m; and (C) 10  $\mu$ L, (D) 200  $\mu$ L of 50 mM CH<sub>3</sub>C(S)NH<sub>2</sub>, scale bars correspond to 500 nm.

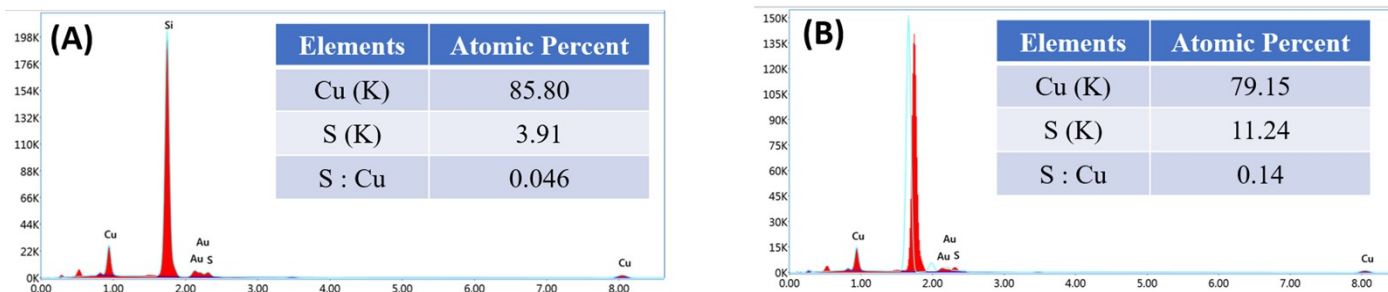

Fig. S8. The EDX spectra of hollow Au@Cu<sub>2-x</sub>S NPs obtained using (A) 10 μL, (B) 200 μL of 50 mM CH<sub>3</sub>C(S)NH<sub>2</sub> aqueous solution.

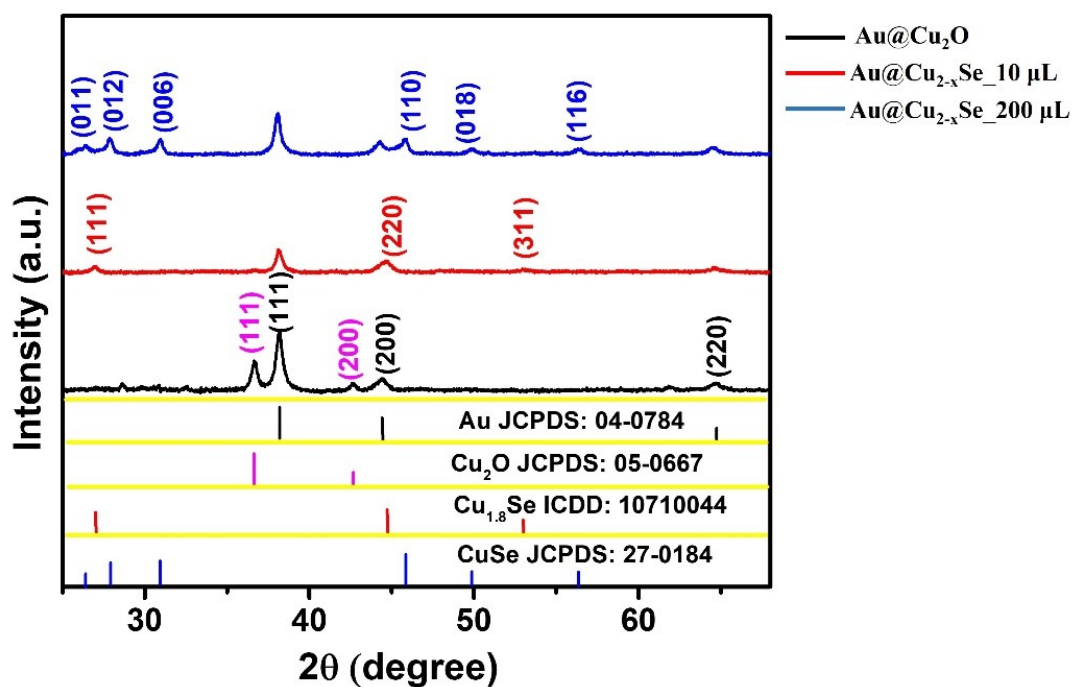

Fig. S9. XRD diffractograms of Au@Cu<sub>2</sub>O NPs, hollow Au@Cu<sub>2-x</sub>Se NPs obtained using 10 μL and 200 μL of 50 mM (CH<sub>3</sub>)<sub>2</sub>NC(Se)NH<sub>2</sub> aqueous solution.

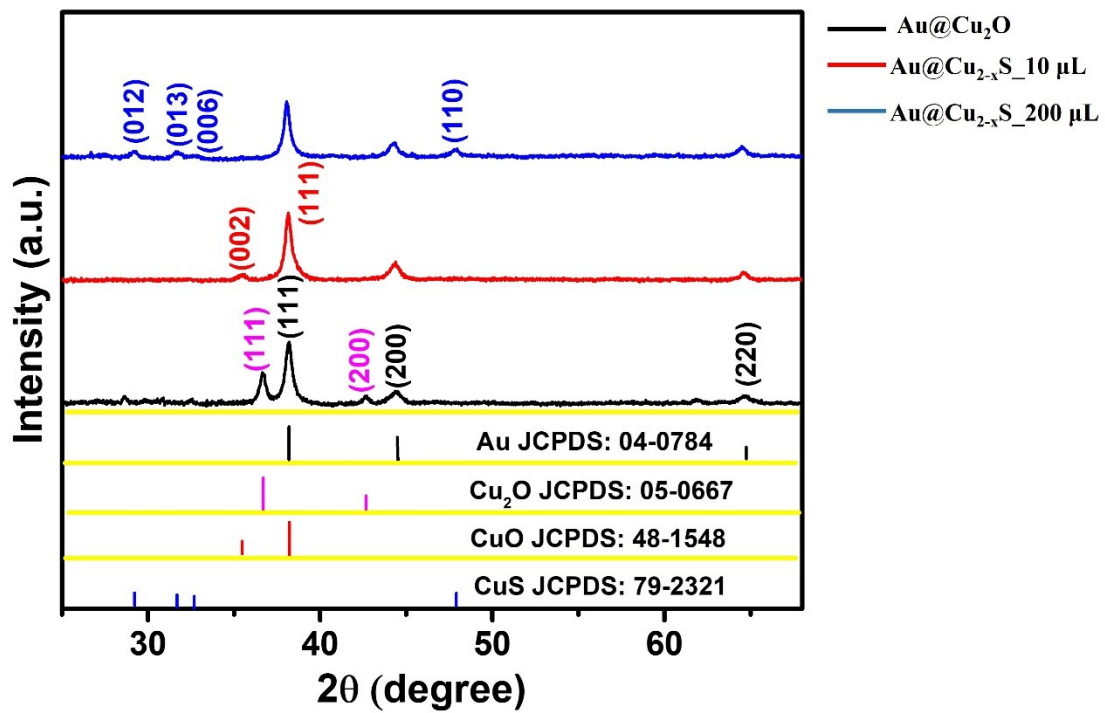

Fig. S10. XRD diffractograms of Au@Cu<sub>2</sub>O NPs, hollow Au@Cu<sub>2-x</sub>S NPs obtained using 10 μL, and 200 μL of 50 mM CH<sub>3</sub>C(S)NH<sub>2</sub> aqueous solution.
